# Supplementary material for: Development of a FRET-based recombinant tension sensor to visualize cell–material interactions
Source: Royal Society of Chemistry journal article supplement (doi:10.1039/c5tb02309b), 2015-12-10
Supplement: c5tb02309b1.pdf [file c5tb02309b1.pdf]

Electric Supplementary Information for  
**Development of a FRET-based recombinant tension sensor to visualize  
cell–material interactions**

Yusuke Kambe <sup>a,\*</sup>, Katsura Kojima <sup>b</sup>, Naohide Tomita <sup>c</sup>, Yasushi Tamada <sup>d</sup>, Tetsuji Yamaoka <sup>a,\*</sup>

<sup>a</sup> Department of Biomedical Engineering, National Cerebral and Cardiovascular Center Research Institute, 5-7-1 Fujishirodai, Suita, Osaka 565-8565, Japan

E-mail: ykambe@ncvc.go.jp; yamtet@ncvc.go.jp

<sup>b</sup> Silk Materials Research Unit, National Institute of Agrobiological Sciences, 1-2 Owashi, Tsukuba, Ibaraki 305-8634, Japan

<sup>c</sup> Department of Mechanical Engineering and Science, Graduate School of Engineering, Kyoto University, Kyoto-Daigaku-Katsura, Nishikyo-ku, Kyoto 615-8540, Japan

<sup>d</sup> Faculty of Textile Science and Technology, Shinshu University, 3-15-1 Tokida, Ueda, Nagano 386-8567, Japan

**Table S1.** Primer sequences for the construction of the plasmids pTrc[mKO-GPGGA8-mUKG - RGDS2], pTrc[mKO-RGDS2], and pTrc[mUKG-RGDS2].

| Primer name  | Sequence (5'–3')                                                                                       |
|--------------|--------------------------------------------------------------------------------------------------------|
| MCS-5        | <u>CGGATCCAAAGGGCCCTTTCATATGCCATGGAAAAAGCTTGGTAC</u>                                                   |
| MCS-3        | <u>CAAGCTTTTTCCATGGCATATGTTTGGGCCCTTGGATCCGAGCT</u>                                                    |
| mKO/mUKG-5   | <i>GGGATCCAGATCTATGGTGAGCGTG</i>                                                                       |
| mKO-3        | <b><u>GGGGCCC</u></b> <i>GGAGTGGGCCACGGCGTC</i>                                                        |
| mUKG-5       | <b><u>GCATATGGTGAGCGTGATCAAGG</u></b>                                                                  |
| mUKG-RGDS2-3 | <b><u>GAAGCTTAACTATCACCACGGCTATCACCACGCTTGCTGGCCTGG</u></b><br><i>CTG</i>                              |
| GPGGA8-1-5   | <b><u>CGGAGGTGCAGGACCAGGAGGAGCAGGACCAGGTGGAGCAG</u></b><br><b><u>GACCAGGTGGTGCTGGACCT</u></b>          |
| GPGGA8-1-3   | <b><u>ACCTGGTCCTGCTCCACCTGGTCCTGCTCCTCCTGGTCCTGCA</u></b><br><b><u>CCTCCGGGCC</u></b>                  |
| GPGGA8-2-5   | <b><u>GGAGGAGCAGGACCTGGAGGAGCAGGTCCAGGAGGAGCAGG</u></b><br><b><u>ACCAGGAGGTGCACA</u></b>               |
| GPGGA8-2-3   | <b><u>TATGTGCACCTCCTGGTCCTGCTCCTCCTGGACCTGCTCCTCCA</u></b><br><b><u>GGTCCTGCTCCTCCAGGTCCAGCACC</u></b> |
| mKO-RGDS2-3  | <b><u>GAAGCTTAACTATCACCACGGCTATCACCACGGGAGTGGGCCAC</u></b><br><i>GG</i>                                |

*Apa*I (GGGCCC), *Bam*HI (GGATCC), *Hind*III (AAGCTT), and *Nde*I (CATATG) are underlined; overhangs of *Apa*I, *Kpn*I (GGTACC), *Nde*I, and *Sac*I (GAGCTC) are underlined and gray; sequences matching the cDNA are italicized; sequences encoding (RGDS)<sub>2</sub> or (GPGGA)<sub>8</sub> are in bold.

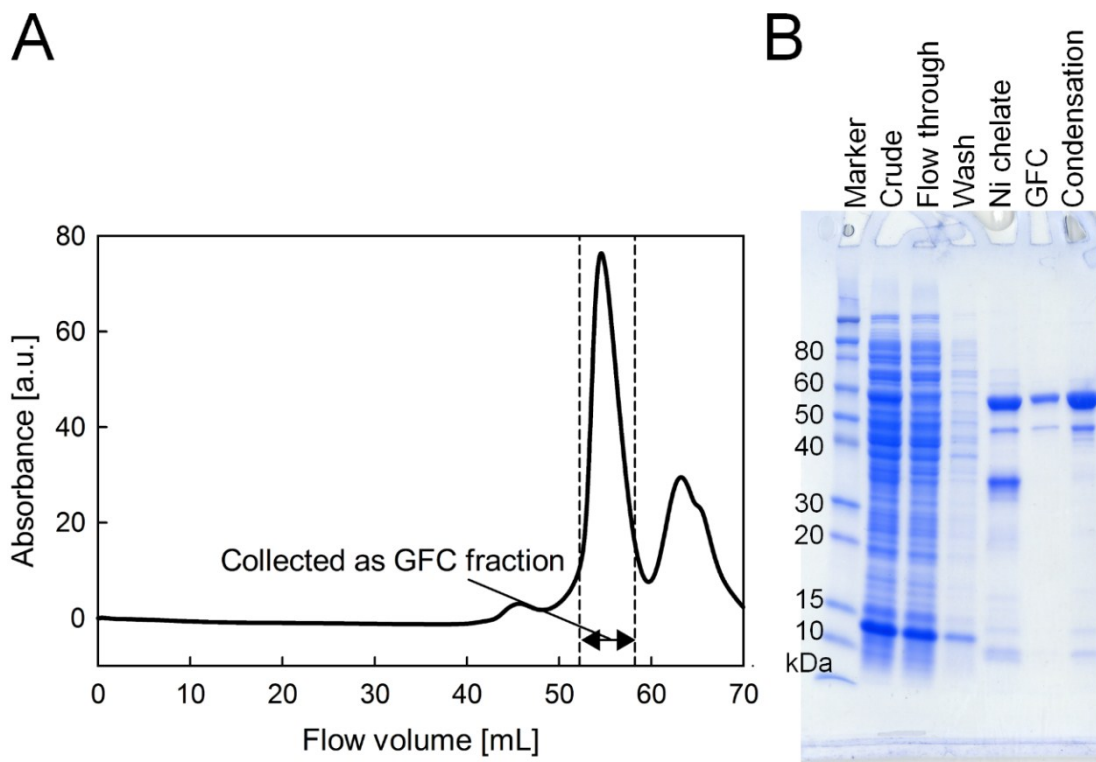

**Figure S1.** FPLC trace of rFRET-TS (A) and SDS-PAGE analysis (B) of solutions obtained in the rFRET-TS purification process.

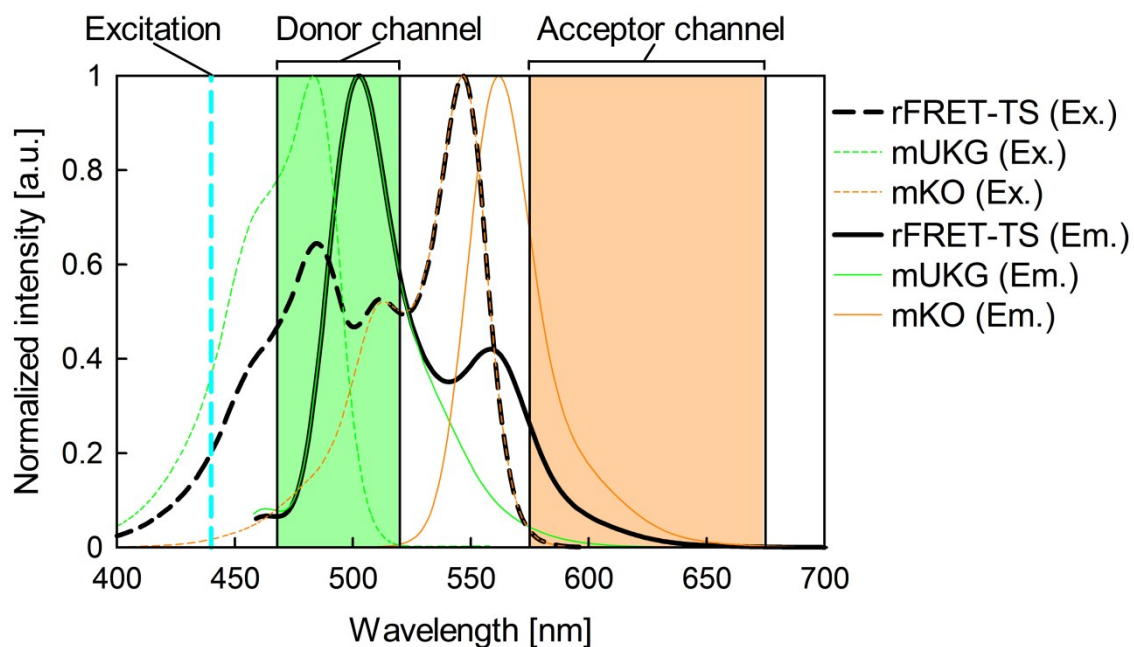

**Figure S2.** Excitation (Ex.) and emission (Em.) spectra of rFRET-TS, mUKG (donor), and mKO (acceptor), with CLSM settings for the fluorescent imaging of cells. The donor in rFRET-TS was excited selectively by a 440-nm laser. In addition, mUKG- and mKO-specific emissions were detected as donor and acceptor channels, respectively, by using appropriate dichroic mirrors and photomultiplier tubes with slits.

rFRET-TS(-)

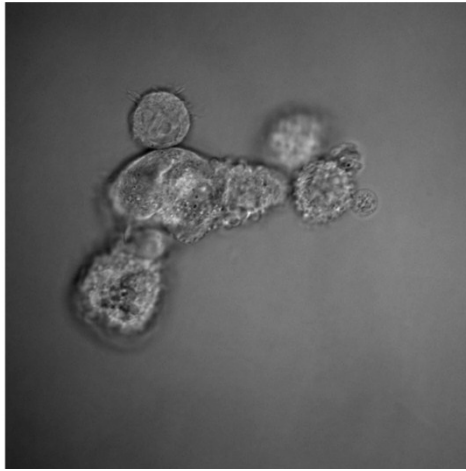

rFRET-TS(+)

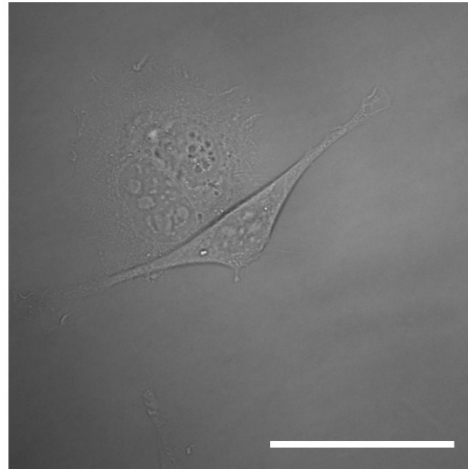

**Figure S3.** NIH3T3 fibroblasts seeded onto PEG-coated glass surfaces with (right) or without (left) the immobilization of rFRET-TS. Pictures were taken at 90 min post-seeding. Scale bar = 50  $\mu\text{m}$ .

Fibroblasts did not adhere to the surface in the absence of rFRET-TS and showed a round shape. In contrast, cells adhered to the sensor-immobilized surface likely due to the cell-adhesion site in rFRET-TS ([RGDS]<sub>2</sub>).

**Movie S1.** Movie of brightfield and FRET index images of fibroblasts on the rFRET-TS-immobilized glass surface. Donor and acceptor emissions were separated and detected simultaneously, with 440-nm excitation, at 5-min intervals. The donor and acceptor images were analyzed to obtain FRET index images by using FV10-ASW software (Olympus, Japan); the intensity of each pixel of the acceptor images was divided by that of the corresponding pixel of the donor images, with a chromatic modulation of 16. The bright and dark colors in the FRET index images indicate a low and high FRET index, respectively. Low FRET is induced by strong tension. The observations were finished within 24 h post cell-seeding.

**Movie S2.** Movie of brightfield and FRET index images of fibroblasts on the rFRET-TS-immobilized glass surface, with the actin depolymerizer cytochalasin D in the medium. Donor and acceptor emissions were separated and detected simultaneously, with 440-nm excitation, at 5-min intervals. Cytochalasin D was added to the medium at a final concentration of 4  $\mu$ M immediately after one time point (i.e., at sixth frame), while imaging was continued. The observations were finished within 24 h post cell-seeding.
